# Supplementary material
Source: MDPI journal article supplement (https://www.mdpi.com/1424-8247/14/1/67)
Supplement: s1 [file s1]

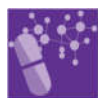

Table S1. Panel of SNPs investigated.

| Gene                  | Rs Code                 | Polymorphism     | Amino acid               | Genotype                                 | Functional effects       |
|-----------------------|-------------------------|------------------|--------------------------|------------------------------------------|--------------------------|
| <b>Transporters</b>   |                         |                  |                          |                                          |                          |
| <b>ABCB1/MDR1</b>     | rs1128503<br>rs1045642  | C1236T<br>C3435T | Gly412Gly<br>Ile1815=    | <b>T allele leads to lower activity</b>  | Decreased                |
| <b>ABBC1/MRP1</b>     | rs45511401              | G671V-G>T        | Gly671Val                |                                          |                          |
| <b>ABCB1</b>          | rs4148738               | G>A              | Intron                   | A allele leads to increased              | Dabigatran concentration |
| <b>ABCC2/MRP2</b>     | rs8187710<br>rs17222723 | G4544A<br>T3563A | Cys1515Tyr<br>Val1188Glu | A allele leads to lower activity         | Decreased                |
| <b>ABCC2 24C&gt;T</b> | rs717620                | C5116T           | Promoter                 | T allele leads to lower expression       | Lower expression         |
| <b>ABCG2</b>          | rs2231142               | C421A            | Gln141Lys                | A allele leads to lower expression       | Lower expression         |
| <b>SLC15A2-L350F</b>  | rs2257212               | C>T              | Leu350Phe                | -                                        | -                        |
| <b>SLCO1B1</b>        | rs4363657<br>rs4149056  | T521C<br>T>C     | Intron<br>Val174Ala      | C allele leads to lower activity         | Decreased                |
| <b>5HTT-LPR</b>       |                         | Repeat region    | Promoter                 | S allele leads to lower transcription    |                          |
| <b>CYP</b>            |                         |                  |                          |                                          |                          |
| <b>CYP1A2*1C</b>      | rs2069514               | G3860A           | None                     | A allele leads to lower activity         | Decreased                |
| <b>CYP1A2*1F</b>      | rs762551                | C163A            | Intron                   | A allele leads to increased inducibility | Increased                |
| <b>CYP2C19*17</b>     | rs12248560              | C806T            | Upstream                 | Heterozygous                             | Increased                |
| <b>CYP2C19*10</b>     | rs6413438               | C680T            | Pro227Leu                | T/A/G alleles leads to lower activity    | Decreased                |
| <b>CYP2C19*2</b>      | rs4244285               | G681A            | Pro227=                  |                                          |                          |
| <b>CYP2C19*3</b>      | rs4986893               | G636A            | Trp212Ter                |                                          |                          |
| <b>CYP2C19*4</b>      | rs28399504              | A5026G           | Met1Val                  | Homozygous                               | Increased                |
| <b>CYP2C19*5</b>      | rs56337013              | C1297T           | Arg433Trp                |                                          |                          |
| <b>CYP2C19*7</b>      | rs72558186              | T24319A          | Splice Donor             |                                          |                          |
| <b>CYP2C9*2</b>       | rs1799853               | C430T            | Cys144Arg                | T/C allele leads to lower activity       | Decreased                |
| <b>CYP2C9*3</b>       | rs1057910               | A1075C           | Ile359Leu                |                                          |                          |
| <b>CYP2D6*2</b>       | rs16947                 | C2850T           | Arg296Cys                | Homozygous                               | Increased                |
| <b>CYP2D6*XN</b>      | -                       | -                | Amplification            | -                                        |                          |
| <b>CYP2D6*10</b>      | rs1065852               | C100T            | Pro34Ser                 | <b>Heterozygous</b>                      | <b>Decreased</b>         |
| <b>CYP2D6*17</b>      | rs28371706              | C1023T           | Thr107Ile                |                                          |                          |
| <b>CYP2D6*6</b>       | rs5030655               | 1707delT         | Trp152fs                 |                                          |                          |
| <b>CYP2D6*20</b>      | rs72549354              | insG             | Leu213fs                 |                                          |                          |
| <b>CYP2D6*5</b>       | -                       | Deletion         | Stop codon               | -                                        | Decreased                |
| <b>CYP2D6*38</b>      | rs72549351              | delGACT          | Thr272fs                 |                                          |                          |

|                                        |                                                   |                                    |                                                  |                                      |                    |
|----------------------------------------|---------------------------------------------------|------------------------------------|--------------------------------------------------|--------------------------------------|--------------------|
| <b>CYP2D6*29</b>                       | rs61736512                                        | G1659A                             | Val136Met                                        | A allele leads to lower activity     | Decreased          |
| <b>CYP2D6*2A</b>                       | rs1080985                                         | C1584G                             | Upstream                                         | Homozygous                           | Decreased          |
| <b>CYP2D6*3</b>                        | rs35742686                                        | 2549delA                           | Arg259fs                                         |                                      |                    |
| <b>CYP2D6*4</b>                        | rs3892097                                         | G1846A                             | Acceptor                                         |                                      |                    |
| <b>CYP2D6*41</b>                       | rs28371725                                        | G2988A                             | Intron                                           |                                      |                    |
| <b>CYP2D6*7</b>                        | rs5030867                                         | A2935C                             | His324Pro                                        |                                      |                    |
| <b>CYP2D6*9</b>                        | rs5030656                                         | 2615-2617delAAG                    | Inframe del.                                     |                                      |                    |
| <b>CYP3A4*1B</b>                       | rs2740574                                         | A392G                              | Upstream                                         | Homozygous                           | Decreased          |
| <b>CYP3A4*22</b>                       | rs35599367                                        | C15389T                            | Intron                                           | G alleles lead to increased activity | Increased          |
| <b>CYP3A5*3</b>                        | rs776746                                          | A6986AG                            | Acceptor                                         | Heterozygous                         | Decreased          |
| <b>CYP1A1</b>                          | rs1048943                                         | T>C                                | Ile462Val                                        | C allele leads to increased activity | Increased          |
| <b>CYP2B6</b>                          | rs2279343<br>rs3745274<br>rs3211371<br>rs28399499 | A785G<br>G516T<br>C1459T<br>T 983C | Lys262Arg<br>Gln172His<br>Arg487Cys<br>Ile328Thr | G/T allele leads to lower activity   | Decreased          |
| <b>CYP2A6</b>                          | rs28399433<br>rs1801272                           | A48C<br>T>A                        |                                                  | C/A allele leads to lower expression | Decreased          |
| <b>CYP2C8*2</b>                        | rs11572103                                        | A805T                              | Ile269Phe                                        | -                                    | -                  |
| <b>CYP2C8*4</b>                        | rs1058930                                         | C792G                              | Ile264Met                                        | C allele leads to lower activity     | Decreased          |
| <b>Other drug metabolizing enzymes</b> |                                                   |                                    |                                                  |                                      |                    |
| <b>TPMT*2</b>                          | rs1800462                                         | C>G                                | Ala80Pro                                         | C allele leads to lower activity     | Decreased          |
| <b>TPMT*3B</b>                         | rs1800460                                         | G460A                              | Ala154Thr                                        | Heterozygous                         | Decreased/Inactive |
| <b>TPMT*3C</b>                         | rs1142345                                         | A719G                              | Tyr240Cys                                        |                                      |                    |
| <b>UGT1A1*28</b>                       | rs8175347                                         | (TA)(n) repeat sequence            | TATA box                                         | 6/7 repeat                           | Decreased          |
| <b>UGT2B17</b>                         |                                                   | Deletion                           |                                                  | Heterozygous                         | Decreased          |
| <b>DPYD</b>                            | rs3918290<br>rs67376798                           | IVS14+1G>A<br>A2846T               | Splice donor<br>Asp949Val                        | Heterozygous<br>Homozygous           | Decreased          |
| <b>DPYD*6</b>                          | rs1801160                                         | G>A                                | Val732Ile                                        | A allele leads to lower activity     | Decrease           |
| <b>DPYD*9A</b>                         | rs1801265                                         | T>C                                | Cys29Arg                                         | -                                    | -                  |
| <b>DPY</b>                             | rs2297595                                         | A166G                              | Initiator Co-don                                 | -                                    | -                  |
| <b>COMT</b>                            | rs4680<br>rs4633                                  | G>A<br>C>T                         | Val158Met<br>His62His                            | A/T alleles lead to lower activity   | Decreased          |

|                             |                            |                 |                                      |                                                                                        |                                 |
|-----------------------------|----------------------------|-----------------|--------------------------------------|----------------------------------------------------------------------------------------|---------------------------------|
| COMT                        | rs4818                     | C>G             | Leu136Leu                            | G alleles lead to increased activity                                                   | Increased                       |
| MTHFR                       | rs1801133<br>rs1801131     | C677T<br>A1298C | Ala222Val<br>Glu429Ala               | T/C alleles lead to lower activity                                                     | Decreased                       |
| TYMS                        | rs45445694                 | TSER*2/TSER*3   | 28 bp repeat in enhancer region      | Increased transcription                                                                | Increased                       |
|                             | rs2853542<br>rs34743033    | TSER*3R G/C     | second repeat of 3R allele           | Reduced transcription                                                                  | Decreased                       |
|                             | rs151264360<br>rs869066439 | 1494del6b       | I/D of TTAAAG sequence on the 3'-UTR | TYMS mRNA instability                                                                  | Decreased                       |
| NAT1*14B                    | rs4986782                  | G560A           | Arg187Gln                            | A allele leads to lower activity                                                       | Decreased                       |
| NAT1*15B                    | rs5030839                  | C599T           | Stop Codon                           | -                                                                                      | Inactive                        |
| NAT1*17B                    | rs56379106                 | C190T           | Arg64Trp                             | C alleles lead to lower activity                                                       | Decreased                       |
| NAT1*22B                    | rs56172717                 | A752T           | Asp251Val                            | T alleles lead to lower activity                                                       | Decreased                       |
| NAT2*3                      | rs1801280                  | T341C           | Ile114Thr                            | C/A alleles lead to lower activity                                                     | Decreased                       |
| NAT2*6                      | rs1799930                  | G590A           | Arg197Gln                            |                                                                                        |                                 |
| NAT2*7                      | rs1799931                  | G857A           | Gly286Glu                            |                                                                                        |                                 |
| UMPS                        | rs1801019                  | G213A<br>G>C    | Gly213Asp<br>Gly213Ala               | -                                                                                      | -                               |
| CBS                         | rs234706                   | C699T           | -                                    | Allele T associated with increased risk of ammonia and sulphite detoxification defects |                                 |
| Receptors                   |                            |                 |                                      |                                                                                        |                                 |
| DRD2/ANKK1-Q713K            | rs1800497                  | C957T           |                                      | Heterozygous                                                                           | Reduced dopamine binding sites  |
| DRD2-141-insC/delC          | rs1799732                  | insC/delC       | Upstream                             | Heterozygous                                                                           | Reduced receptor expression     |
| DRD2-S311C                  | rs1801028                  | C932G           | Ser311Cys                            | Heterozygous                                                                           | Decreased affinity for dopamine |
| DRD3-S9G                    | rs6280                     | A25G            | Gly9Ser                              | Homozygous                                                                             | Normal                          |
| HTR2A                       | rs6314                     | C1354T          | His452Ty                             | Heterozygous                                                                           | -                               |
|                             | rs7997012                  | A>G             | Intron                               | Homozygous                                                                             | -                               |
|                             | rs6311                     | G1438A          | Upstream                             | Homozygous                                                                             | -                               |
| HTR2C                       | rs6318                     | G68C            | Cys23Ser                             | Homozygous                                                                             | Increased cardiovascular events |
| OPRM1                       | rs1799971                  | A118G           | Asn40Asp                             | Heterozygous                                                                           | More pain                       |
| Oxidation reduction enzymes |                            |                 |                                      |                                                                                        |                                 |

|                            |                        |                   |                            |                                                      |                                     |
|----------------------------|------------------------|-------------------|----------------------------|------------------------------------------------------|-------------------------------------|
| <b>GSTP1</b>               | rs1695                 | A313G             | Ile105Val                  | C allele leads to lower activity                     | Decreased                           |
| <b>GSTM1<br/>GSTT1</b>     |                        | Deletion          |                            | Heterozygous                                         | Inactive                            |
| <b>DNA repair enzymes</b>  |                        |                   |                            |                                                      |                                     |
| <b>ERCC1</b>               | rs3212986<br>rs11615   | C8092A<br>T19007C | 3 Prime UTR<br>Asn118=     | -                                                    | -                                   |
| <b>XRCC1</b>               | rs25487                | G28152A           | Gln399Arg                  | Heterozygous                                         | Decreased                           |
| <b>Lipid metabolism</b>    |                        |                   |                            |                                                      |                                     |
| <b>APOA1</b>               | rs1799837              | G75A              |                            | Protective against cardiovascular event              |                                     |
| <b>APOB1</b>               | rs5742904              | G10580A           | Arg3500Gln                 | Heterozygous                                         | Hypercholesterolemia                |
| <b>CETP</b>                | rs1532624              | C>A               | Intron                     | -                                                    | -                                   |
| <b>HMGCR</b>               | rs3761740<br>rs5908    | C911A<br>A>G      | Upstream tra.<br>Ile585Val | -                                                    | -                                   |
| <b>PON1</b>                | rs662<br>rs705379      | A575G<br>C108T    | Gln192Arg<br>Upstream      | G/T alleles lead to lower activity                   | Decreased                           |
| <b>Coagulation enzymes</b> |                        |                   |                            |                                                      |                                     |
| <b>VKORC</b>               | rs9923231              | G1639A            | Upstream                   | A/T alleles lead to less coagulating capacity        | Decreased                           |
|                            | rs9934438              | C1173T            | Intron                     |                                                      |                                     |
| <b>CES1</b>                | rs2244613<br>rs8192935 | A>C<br>C>T        | Intron                     | C allele leads to decreased Dabigatran concentration |                                     |
| <b>F II</b>                | rs1799963              | G20210A           | 3 Prime UTR                | -                                                    | -                                   |
| <b>PAI</b>                 | rs1799889              | 4G/5G             | Upstream                   | Heterozygous                                         | Increased risk of thrombotic events |
| <b>F V</b>                 | rs6025                 | G1691A            | Arg506Gln                  | A allele Increased                                   | risk of thrombotic events           |
| <b>β-fibrinogen</b>        | rs1800790              | G455A             | -                          | -                                                    | -                                   |
| <b>FattoreXIII</b>         | rs5985                 | G>T               | Val135Leu                  | -                                                    | -                                   |

Abbreviation: ABCB1, ATP binding cassette subfamily B member 1; ABCC1, ATP Binding Cassette Subfamily C Member 1; MRP1, Multidrug resistance-associated protein 1; ABCC2, ATP Binding Cassette Subfamily C Member 2; MRP2, Multidrug resistance-associated protein 2; ABCG2, ATP-binding cassette sub-family G membro 2; SLC15A2, Solute Carrier Family 15 Member 2; SLC01B1, solute carrier organic anion transporter family member 1B1; 5-HTTLPR, serotonin-transporter-linked polymorphic region; CYP1A2, Cytochrome P450 Family 1 Subfamily A Member 2; CYP2C19, cytochrome P450 family 2 subfamily C member 19; CYP2D6 Cytochrome P450 family 2 subfamily D member 6; CYP3A4, Cytochrome P450 family 3 subfamily A member 4; CYP3A5, Cytochrome P450 family 3 subfamily A member 5; CYP1A1 Cytochrome P450 family 1 subfamily A member 1; CYP2B6 Cytochrome P450 family 2 subfamily B member 6; CYP2C8, Cytochrome P450 family 2 subfamily C member 8; TPMT, Thiopurine methyltransferase; UGT1A1, uridine-diphosphoglucuronate glucuronosyltransferase; DPYD, dihydropyrimidinase; COMT, catechol O-methyltransferase; TSER, syn-thase enhancer region; MTHFR, methylenetetrahydrofolate reductase; TYMS, thymidylate synthase; NAT1, Arylamine N-acetyltransferase 1; NAT2, Arylamine N-acetyltransferase 2; UMP5, Uridine Monophosphate Synthetase; DRD2, do-pamine receptor D2; ANKK1, Ankyrin repeat and kinase domain containing 1; HTR2A, 5-Hydroxytryptamine Receptor 2A; HTR2C, 5-Hydroxytryptamine Receptor 2C; OPRM1, Opioid Receptor Mu 1; GSTP1, Glutathione S-Transferase P1; GSTM1, glutathione S-transferase Mu 1; GSTT1, Glutathione S-Transferase Theta 1; ERCC1, Excision Repair 1, Endonu-lease Non-Catalytic Subunit; XRCC1, X-ray repair cross complementing protein 1; APOA1, Apolipoprotein A1; APOB1, Apolipoprotein B1; CETP, Cholesteryl ester transfer protein; HMGCR, 3-Hydroxy-3-Methylglutaryl-CoA Re-ductase; PON1, paraoxonase/arylesterase 1; VKORC, Vitamin K epoxide Reductase Complex; CES1 Carboxylic ester hydrolase; F II, coagulation factor II; PAI, Plasminogen Activator Inhibitor; F V, coagulation factor V; CBS, cystathionine beta-synthase; F XIII, coagulation factor XIII;
